# Supplementary material
Source: MDPI journal article supplement (https://www.mdpi.com/2304-6740/10/12/223)
Supplement: s1 [file s1]

# **Low-dimensional compounds containing bioactive ligands. Part XIX: Crystal structures and biological properties of copper complexes with halogen and nitro derivatives of 8-hydroxyquinoline**

**Martina Kepeňová <sup>1</sup>, Martin Kello <sup>2</sup>, Romana Smolková <sup>3</sup>, Michal Goga <sup>4</sup>, Richard Frenák <sup>4</sup>, Ľudmila Tkáčiková <sup>5</sup>, Miroslava Litecká <sup>6</sup>, Jan Šubrt <sup>6</sup> and Ivan Potočnýák <sup>1,\*</sup>**

<sup>1</sup> Institute of Chemistry, P. J. Šafárik University in Košice, Moyzesova 11, SK-04154 Košice, Slovakia

<sup>2</sup> Department of Pharmacology, P. J. Šafárik University in Košice, Trieda SNP 1, 040 11 Košice, Slovakia

<sup>3</sup> Department of Ecology, Faculty of Humanities and Natural Sciences, University of Prešov, Ulica 17. novembra 1, Prešov, 081 16, Slovakia

<sup>4</sup> Department of Botany, Institute of Biology and Ecology, Faculty of Science, P. J. Šafárik University in Košice, Mánesova 23, 040 01 Košice, Slovakia

<sup>5</sup> Department of Chemistry, Biochemistry and Biophysics, University of Veterinary Medicine and Pharmacy, Komenského 73, 041 81 Košice, Slovakia

<sup>6</sup> Centre of Instrumental Techniques, Institute of Inorganic Chemistry of the CAS, Husinec-Řež č.p. 1001, CZ-25068 Řež, Czech Republic

\* Correspondence: ivan.potocnak@upjs.sk; Tel.: +421 55 234 2335; fax: +421 55 62 221 24

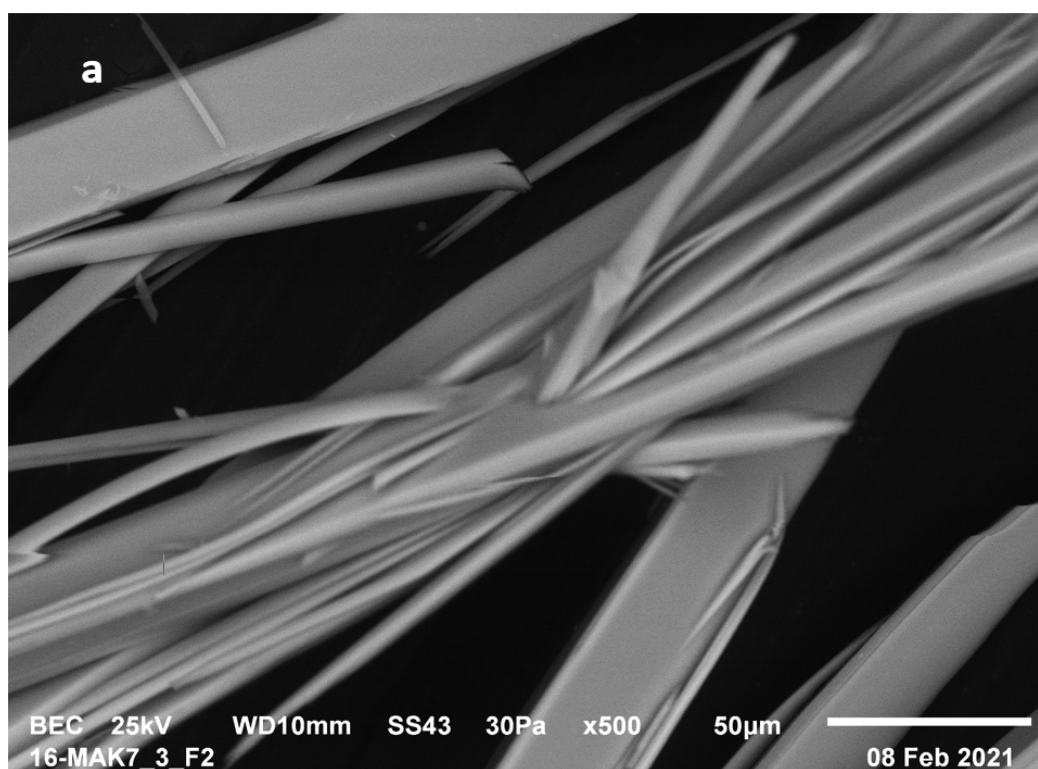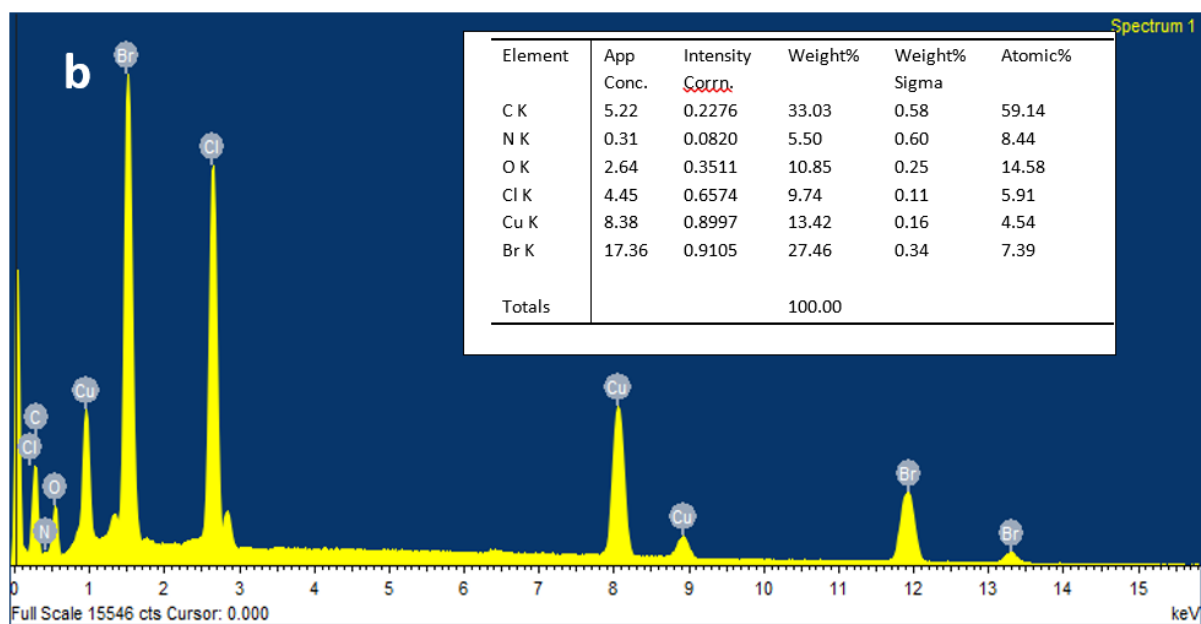

**Figure S1.** SEM micrograph (a) of **1a** along with EDS elemental analysis (b).

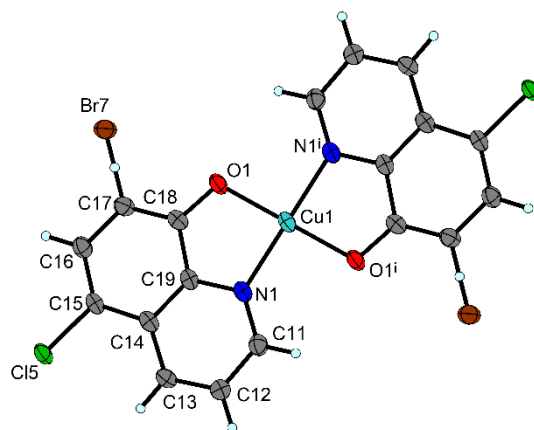

**Figure S2.** Molecular structure of **1a**. Displacement ellipsoids are drawn at the 50 % probability levels. Symmetry code: i = -x, -y+1, -z+1.

**Table S1.** Hydrogen bonds [ $\text{\AA}$  and  $^\circ$ ] for **5** and **6**.

|   | D–H $\cdots$ A                       | <i>d</i> (D–H) | <i>d</i> (H $\cdots$ A) | <i>d</i> (D $\cdots$ A) | $\angle$ (DHA) |
|---|--------------------------------------|----------------|-------------------------|-------------------------|----------------|
| 5 | C12–H12 $\cdots$ O2 <sup>ii</sup>    | 0.93           | 2.46                    | 3.154(3)                | 132.0          |
|   | C3A–H3A3 $\cdots$ O52 <sup>iii</sup> | 0.96           | 2.47                    | 3.348(6)                | 152.6          |
| 6 | C12–H12 $\cdots$ O72 <sup>ii</sup>   | 0.95           | 2.58                    | 3.456(3)                | 154.2          |

Symmetry codes:

**5:** ii =  $x-1, y, z$ ; iii =  $-x+2, -y+1, z$ ;

**6:** ii =  $x-1, -y+3/2, z-1/2$ .
